# Supplementary material for: AnkyrinG is required for maintenance of the axon initial segment and neuronal polarity
Source: PubMed Central journal article supplement — J Cell Biol. 2008 Nov 17;183(4):635–40. doi: 10.1083/jcb.200806112 (PMC2582894; doi:10.1083/jcb.200806112), 2008-11-17
Supplement: jcb.200806065_1.pdf [file jcb.200806065_1.pdf]

Hiraga et al., <http://www.jcb.org/cgi/content/full/jcb.200806065/DC1>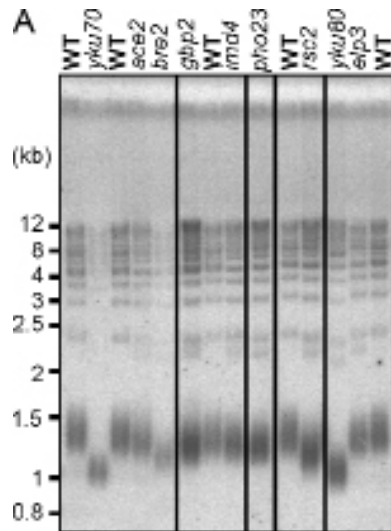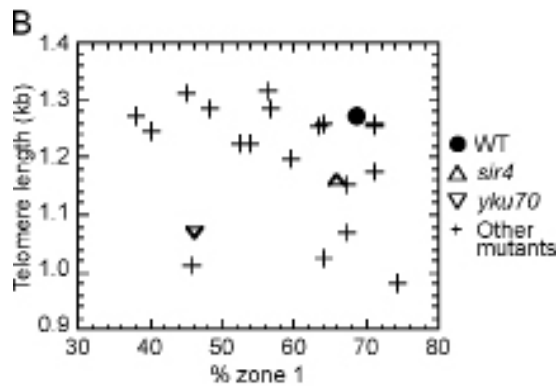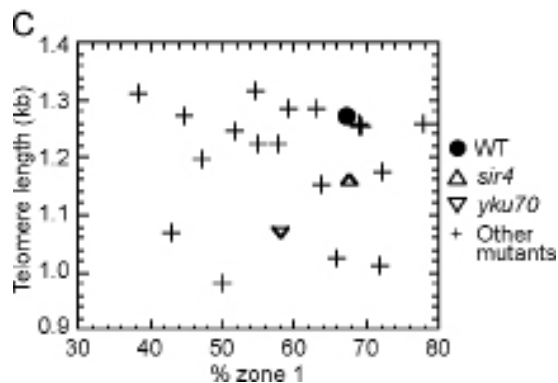

Figure S1. **No correlation between telomere length and positioning.** (A) Telomere length analyzed, as in Fig. 3, in mutants proficient for telomere positioning. Note that this composite image consists of several different portions of a single gel, not a composition from multiple gels. Black lines indicate that intervening lanes have been spliced out. (B) Telomere length versus telomere position during G1 phase is plotted, as in Fig. 3 B, for all Rap1 organization mutants listed in Table I. (C) Telomere length versus telomere position during S phase is plotted, as in Fig. 3 B, for identical set of mutants as in B.

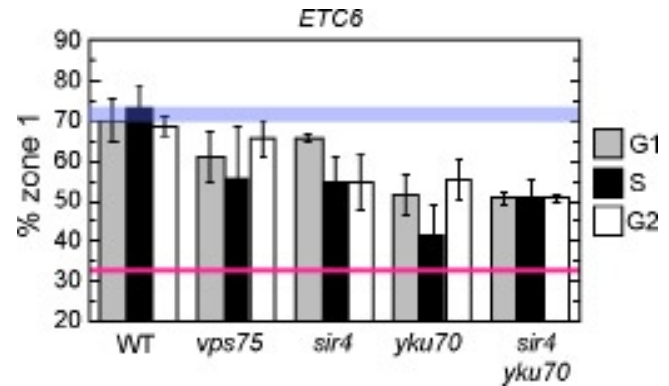

Figure S2. **Effect of *vps75*Δ, *sir4*Δ, and *yku70*Δ on perinuclear localization of the *ETC8* locus.** Localization of *ETC8* was tested as in Fig. 6 in the following strains: *vps75*Δ, *sir4*Δ, *yku70*Δ, and *sir4 yku70*Δ. WT and random localization values are indicated by blue and red lines, respectively.

**Table S1. Summary of Rap1 screening**

| Gene        | ORF name | Category | Known function.                                                                                                                    | Known complex        | Rap1 phenotype | Score | Notes                                                                                          |
|-------------|----------|----------|------------------------------------------------------------------------------------------------------------------------------------|----------------------|----------------|-------|------------------------------------------------------------------------------------------------|
| ASF1        | YJL115W  | cd       | Anti-silencing protein; histone chaperone; histone deposition                                                                      |                      | B              | 3     |                                                                                                |
| BRE2        | YLR015W  | cl       | Histone-lysine N-methyltransferase, cohesion                                                                                       | Set1/COMPASS complex | B              | 3     | Aberrant nuclear morphology                                                                    |
| CHL1 (CTF1) | YPL008W  | d        | Rad3p-like ATP-dependent DNA helicase subfamily. cohesion                                                                          |                      | C              | 3     |                                                                                                |
| CTF18       | YMR078C  | cdl      | Alternative RFC; Protein required for accurate chromosome transmission in mitosis and maintenance of normal telomere length        | Ctf18-RLC            | B              | 3     | Most cells are large and sick-looking                                                          |
| CTF4        | YPR135W  | d        | Protein required for DNA synthesis, binds DNA pol alpha; cohesion                                                                  |                      | B              | 3     | Many enlarged cells. Rap1 clusters diminished in all cells and almost absent in enlarged cells |
| CTF8        | YHR191C  | cdl      | Subunit of a complex with Ctf18p that shares some subunits with Replication Factor C and is required for sister chromatid cohesion | Ctf18-RLC            | B              | 3     | Most cells are large and sick-looking                                                          |
| DCC1        | YCL016C  | cdl      | Part of an alternative RFC complex                                                                                                 | Ctf18-RLC            | B              | 3     | Most cells are large and sick-looking                                                          |
| HNT3        | YOR258W  | r        | Member of the third branch of the histidine triad (HIT) superfamily of nucleotide-binding proteins                                 |                      | C              | 3     | Most cells are enlarged                                                                        |

|         |         |      |                                                                                                                                          |                                                                  |   |   |                                    |
|---------|---------|------|------------------------------------------------------------------------------------------------------------------------------------------|------------------------------------------------------------------|---|---|------------------------------------|
| NHP10   | YDL002C | cl   | Transcription, DNA maintenance, and/or chromatin structure as part of Ecm16p-associated complex                                          | INO80 complex, Isw1-associated complex, Ecm16-associated complex | C | 3 |                                    |
| PGD1    | YGL025C | l    | Telomeric silencing. Affects DNA supercoiling in vivo                                                                                    | RNA polymerase II mediator complex                               | B | 3 | Nucleolus enlarged                 |
| RRM3    | YHR031C | cdlr | DNA helicase involved in rDNA replication and Ty1 transposition; promotes replication fork progression through replication pausing sites |                                                                  | B | 3 |                                    |
| RSC1    | YGR056W | c    | Component of the abundant RSC complex involved in chromatin remodelling                                                                  | RSC                                                              | C | 3 |                                    |
| SIR3    | YLR442C | cl   | Silencing regulatory and DNA-repair protein                                                                                              | SIR                                                              | B | 3 |                                    |
| SIR4    | YDR227W | cl   | Silencing regulatory and DNA-repair protein                                                                                              | SIR                                                              | B | 3 |                                    |
| YAL049C | YAL049C | r    | Protein of unknown function localized to cytoplasm and nucleus                                                                           |                                                                  | C | 3 |                                    |
| YKU80   | YMR106C | cdl  | Telomere binding, telomere length, telomeric silencing                                                                                   | yKu                                                              | B | 3 |                                    |
| ACE2    | YLR131C | d    | Metallothionein expression activator. Expression of G1-specific genes                                                                    |                                                                  | A | 2 | Partially defective in cytokinesis |

|      |         |   |                                                                                                                                                                                              |                                 |   |   |                                                |
|------|---------|---|----------------------------------------------------------------------------------------------------------------------------------------------------------------------------------------------|---------------------------------|---|---|------------------------------------------------|
| CSM4 | YPL200W |   | Protein required for accurate chromosome segregation during meiosis. Required for telomere positioning during meiosis                                                                        |                                 | B | 2 |                                                |
| ELP3 | YPL086C | c | Histone acetyltransferase (HAT) that is part of the six-subunit Elongator complex, which is a major component of the RNA polymerase II holoenzyme responsible for transcriptional elongation | Elongator complex               | B | 2 |                                                |
| ELP4 | YPL101W | c | A subunit of the six-subunit Elongator complex, which is a major histone acetyltransferase component of the RNA polymerase II holoenzyme responsible for transcriptional elongation          | RNA pol II elongator holoenzyme | B | 2 |                                                |
| GBP2 | YCL011C |   | Protein involved in mRNA export, binds poly(A)+ RNA and single-stranded G-strand telomere sequence. Required for Rap1 localization                                                           |                                 | A | 2 | Aberrant nuclear shape with enlarged nucleolus |
| HDA1 | YNL021W | c | Histone deacetylase A                                                                                                                                                                        |                                 | C | 2 |                                                |
| IMD4 | YML056C | t | Complex of Imd2p, Imd3p, and Imd4p that binds a C-rich portion of telomeric DNA forms independently of Sir1p, Sir3p, Sir4p, and Rap1p                                                        |                                 | A | 2 | Defect mainly observed in small-budded cells   |

|        |         |    |                                                                                                            |                                       |     |   |                                              |
|--------|---------|----|------------------------------------------------------------------------------------------------------------|---------------------------------------|-----|---|----------------------------------------------|
| JJJ1   | YNL227C | r  | Co-chaperone that stimulates the ATPase activity of Ssa1p, required for a late step of ribosome biogenesis |                                       | A/C | 2 | Defect mainly observed in small-budded cells |
| MRE11  | YMR224C | dl | DNA repair and meiotic recombination protein                                                               | MRX                                   | B   | 2 |                                              |
| PHO23  | YNL097C | c  | Probable component of the Rpd3 histone deacetylase complex, involved in transcriptional regulation of PHO5 | Rpd3-Sin3 histone deacetylase complex | B   | 2 |                                              |
| RAD16  | YBR114W | l  | Nucleotide excision repair protein                                                                         |                                       | C   | 2 |                                              |
| RAD27  | YKL113C | dl | ssDNA endonuclease and 5'-3' exonuclease; Fen-1 flap endonuclease                                          |                                       | B   | 2 | Most cells sick-looking                      |
| RSC2   | YLR357W | cd | Component of the abundant RSC complex involved in chromatin remodelling. Cohesion                          | RSC                                   | B   | 2 |                                              |
| SCP160 | YJL080C | c  | Mutant reported to be defective in telomere clustering                                                     |                                       | C   | 2 | Most cells are enlarged                      |
| SIC1   | YLR079W | d  | P40 inhibitor of Cdc28p-Clb protein kinase complex                                                         |                                       | A/B | 2 |                                              |
| SPE1   | YKL184W | r  | Ornithine decarboxylase; spermine biosynthesis                                                             |                                       | A   | 2 | Slow growth                                  |
| SWI3   | YJL176C | d  | Transcription regulatory protein                                                                           | SWI-SNF complex                       | B   | 2 |                                              |
| TDP1   | YBR223C | cd | Tyrosyl-DNA phosphodiesterase, involved in DNA repair. Telomeric, mating-type, and rDNA silencing          |                                       | C   | 2 |                                              |

|      |         |    |                                                                                                                                                                                                                                      |                                          |     |   |  |
|------|---------|----|--------------------------------------------------------------------------------------------------------------------------------------------------------------------------------------------------------------------------------------|------------------------------------------|-----|---|--|
| TEL1 | YBL088C | l  | ATM homolog; Telomere length control protein                                                                                                                                                                                         |                                          | B   | 2 |  |
| UFD2 | YDL190C | r  | Ubiquitin chain assembly factor (E4) that cooperates with a ubiquitin-activating enzyme (E1), a ubiquitin-conjugating enzyme (E2), and a ubiquitin protein ligase (E3) to conjugate ubiquitin to substrates; also functions as an E3 |                                          | C   | 2 |  |
| ABM1 | YJR108W | r  | Protein required for normal microtubule structure                                                                                                                                                                                    | Myo3p-Bee1p-Vrp1p actin assembly complex | B   | 1 |  |
| ADA2 | YDR448W | c  | Component of nucleosomal histone acetyltransferase complexes SAGA and ADA, also a component of SLIK complex                                                                                                                          | SAGA, ADA, SLIK                          | B   | 1 |  |
| APN1 | YKL114C | r  | Major Apurinic/Apyrimidinic endonuclease. 3'-repair diesterase.                                                                                                                                                                      |                                          | B   | 1 |  |
| ARP6 | YLR085C | c  | Nuclear actin-related protein involved in chromatin remodeling                                                                                                                                                                       | SWR1 complex                             | B/C | 1 |  |
| ASF2 | YDL197C | cn | GFP fusion forms perinuclear foci. Over-expression interfere with mating-type silencing                                                                                                                                              |                                          | B   | 1 |  |
| BIO2 | YGR286C | r  | Biotin synthase                                                                                                                                                                                                                      |                                          | A   | 1 |  |

|       |         |   |                                                                                                                                                                                                                                             |                     |   |   |                                                                                    |
|-------|---------|---|---------------------------------------------------------------------------------------------------------------------------------------------------------------------------------------------------------------------------------------------|---------------------|---|---|------------------------------------------------------------------------------------|
| BSC5  | YNR069C | n | Binds phosphoinositol 3,4,5-triphosphate in vitro. Overproduced protein tagged with V5 epitope at the C terminus localizes to cytoplasm and nucleus, and shows some concentrated staining around the nuclear rim in budded, unbudded cells. |                     | C | 1 |                                                                                    |
| CAC2  | YML102W | c | Chromatin assembly complex subunit 1, involved in nucleosome assembly linked with DNA replication                                                                                                                                           | CAF-1 (p60 subunit) | B | 1 | Most cells are enlarged                                                            |
| CDC73 | YLR418C | c | DNA-directed RNA polymerase II accessory protein; involved in telomeric silencing                                                                                                                                                           |                     | B | 1 |                                                                                    |
| DHH1  | YDL160C | r | Putative RNA helicase of the DEAD box family.                                                                                                                                                                                               |                     | B | 1 |                                                                                    |
| DOA1  | YKL213C | c | WD repeat protein required for ubiquitin-mediated protein degradation                                                                                                                                                                       |                     | B | 1 |                                                                                    |
| EAF3  | YPR023C | c | Component of NuA4 histone acetyltransferase complex                                                                                                                                                                                         | NuA4                | B | 1 | Unusually variable brightness of GFP-Rap1 foci in single cells. Nucleolus enlarged |
| EBS1  | YDR206W | l | Protein with similarity to Est1p, involved in maintenance of telomeres. Null mutant has shortened telomeres                                                                                                                                 |                     | B | 1 |                                                                                    |
| ESC2  | YDR363W | c | Protein involved in chromatin silencing, has a SUMO domain                                                                                                                                                                                  |                     | A | 1 |                                                                                    |

|      |         |    |                                                                                                         |              |   |   |                                                                                                |
|------|---------|----|---------------------------------------------------------------------------------------------------------|--------------|---|---|------------------------------------------------------------------------------------------------|
| FKH2 | YNL068C | c  | Homolog of fly forkhead, involved in transcriptional silencing, cell morphology and cell cycle          |              | A | 1 |                                                                                                |
| GCN5 | YGR252W | c  | Catalytic component of two nucleosomal histone acetyltransferase complexes: SAGA and ADA                | SAGA, ADA    | A | 1 |                                                                                                |
| GRE2 | YOL151W | n  | Null mutant displays defective localization of nuclear pore component Nup49p and nucleolar marker Nop1p |              | B | 1 |                                                                                                |
| GSP2 | YOR185C | n  | Nuclear trafficking                                                                                     |              | A | 1 |                                                                                                |
| HEK2 | YBL032W | cl | RNA binding protein with similarity to hnRNP-K that localizes to the cytoplasm and to subtelomeric DNA  |              | B | 1 | Defect mainly observed in small-budded cells. Most cells are enlarged, sometimes unusual shape |
| HIR2 | YOR038C | c  | Involved in replication-independent histone deposition together with Asf1                               | Hir          | A | 1 |                                                                                                |
| HMO1 | YDR174W | c  | May be involved in higher-order chromatin structure                                                     |              | B | 1 |                                                                                                |
| HOS3 | YPL116W | c  | member of histone deacetylase family.                                                                   |              | A | 1 |                                                                                                |
| HSN1 | YHR127W | n  | Protein of unknown function localized to nucleus; purifies with the nuclear pore complex                |              | B | 1 | Defect mainly observed in small-budded cells                                                   |
| HST1 | YOL068C | c  | NAD-dependent histone deacetylase of the Sir2 family. Component of Set3p complex                        | Set3 complex | B | 1 |                                                                                                |



|        |         |    |                                                                                                                                                                                                    |  |     |   |                                                                      |
|--------|---------|----|----------------------------------------------------------------------------------------------------------------------------------------------------------------------------------------------------|--|-----|---|----------------------------------------------------------------------|
| IDH1   | YNL037C | r  | NAD-dependent histone deacetylase of the Sir2 family. Component of Set3p complex                                                                                                                   |  | A   | 1 |                                                                      |
| IML3   | YBR107C | t  | Complex of Imd2p, Imd3p, and Imd4p that binds a C-rich portion of telomeric DNA forms independently of Sir1p, Sir3p, Sir4p, and Rap1p                                                              |  | A/C | 1 |                                                                      |
| IWR1   | YDL115C | cl | Interacts with RNA polymerase II                                                                                                                                                                   |  | B   | 1 | Most cells are large and sick-looking. Possibly defective in mitosis |
| KAP122 | YGL016W | n  | GFP-Pdr6p displays a punctate nuclear envelope staining typical of a nuclear pore complex component                                                                                                |  | C   | 1 |                                                                      |
| LSM1   | YJL124C | cn | Null mutant displays defective localization of nuclear pore component Nup49p and nucleolar marker Nop1p. Null mutant exhibits defective mating type and rDNA gene silencing, compared to wild type |  | A   | 1 | Nucleolus enlarged                                                   |
| MCM22  | YJR135C | d  | Protein required for maintenance of chromosomes and minichromosomes                                                                                                                                |  | B   | 1 | Large sick-looking cells                                             |
| MGS1   | YNL218W | d  | yWHIP. A member of the AAA family ATPases, DNA-dependent ATPase required for genome stability, appears to be a DNA replication accessory factor that is specific for pol delta                     |  | A   | 1 |                                                                      |

|             |         |    |                                                                                                                                                    |                                                         |     |   |                                                                 |
|-------------|---------|----|----------------------------------------------------------------------------------------------------------------------------------------------------|---------------------------------------------------------|-----|---|-----------------------------------------------------------------|
| MSI1        | YBR195C | c  | Chromatin assembly complex, subunit 3, involved in both nucleosome assembly linked with DNA replication and negative regulation of the RAS pathway | CAF-1                                                   | C   | 1 |                                                                 |
| NPT1        | YOR209C | c  | Required for telomeric and rDNA gene silencing                                                                                                     |                                                         | A   | 1 |                                                                 |
| NUP53       | YMR153W | rn | Component of the karyopherin docking complex of the nuclear pore complex; has similarity to Asm4p                                                  | Karyopherin docking complex of the nuclear pore complex | C   | 1 |                                                                 |
| PIF1        | YML061C | l  | 5'-3' helicase required to regulate telomere length                                                                                                |                                                         | C   | 1 | Abnormally bright foci. Possibly due to longer telomeres (ref)? |
| RAD52       | YML032C | cd | Recombination and DNA repair protein                                                                                                               |                                                         | A   | 1 |                                                                 |
| RAD6        | YGL058W | c  | E2 ubiquitin-conjugating enzyme; involved in telomeric silencing                                                                                   |                                                         | C   | 1 | Defect mainly observed in small and medium-budded cells         |
| RAD7        | YJR052W | c  | Interact with Sir3                                                                                                                                 |                                                         | C   | 1 |                                                                 |
| RFM1        | YOR279C | c  | Protein that interact with Hst1p-Sum1p complex which has histone deacetylase activity                                                              | Hst1p-Sum1p complex                                     | B   | 1 | Defect mainly observed in unbudded cells                        |
| RLF2 (CAC1) | YPR018W | c  | Chromatin assembly complex, subunit p90                                                                                                            | CAF-1 (p90 subunit)                                     | B   | 1 | Most cells are enlarged                                         |
| SAS5        | YOR213C | c  | Component of SAS complex, involved in silencing at telomeres and the silent mating-type loci                                                       | SAS complex                                             | A/C | 1 |                                                                 |
| SIR2        | YDL042C | c  | Silencing regulatory protein and DNA-repair protein                                                                                                |                                                         | B   | 1 |                                                                 |

|       |         |   |                                                                                                                                                                                                       |         |     |   |                                              |
|-------|---------|---|-------------------------------------------------------------------------------------------------------------------------------------------------------------------------------------------------------|---------|-----|---|----------------------------------------------|
| SIZ1  | YDR409W | d | SUMO ligase that conjugates Smt3p with septins, also conjugates Smt3p to Pol30p (PCNA), which may be antagonistic to nonproteolytic ubiquitination of Pol30p in the Rad6-dependent DNA repair pathway |         | B   | 1 | Defect mainly observed in small-budded cells |
| SNF5  | YBR289W | d | SWI-SNF complex; may be involved in initiation of DNA replication                                                                                                                                     | SWI-SNF | B   | 1 |                                              |
| SPO69 | YPR007C | d | sister chromatid cohesion during meiosis both at centromere and the arms near telomeres                                                                                                               |         | C   | 1 |                                              |
| SPO77 | YML066C | r | Probably ATP-powered Ca <sup>2+</sup> pump, possible role in sporulation                                                                                                                              |         | A   | 1 |                                              |
| SPT23 | YKL020C | n | GFP-Spt23p fusion protein localizes to the nucleus uniformly and may interact with the nuclear membrane                                                                                               |         | A   | 1 |                                              |
| SUM1  | YDR310C | c | Interacts with Hst1p and Rfm1p in a complex with histone deacetylase activity                                                                                                                         |         | A   | 1 |                                              |
| TRF4  | YOL115W | d | Catalytic subunit of TRAMP (Trf4/Pap2p-Mtr4p-Air1p/2p), a nuclear poly (A) polymerase complex                                                                                                         |         | A/B | 1 |                                              |

|         |         |    |                                                                                                                                                           |     |     |   |                                         |
|---------|---------|----|-----------------------------------------------------------------------------------------------------------------------------------------------------------|-----|-----|---|-----------------------------------------|
| UPF3    | YGR072W | cl | Protein involved with Nam7p and Nmd2p in decay of mRNA containing nonsense codons; telomere length and telomeric silencing                                |     | B   | 1 |                                         |
| VTC2    | YFL004W | r  | Putative polyphosphate synthetase                                                                                                                         |     | B   | 1 |                                         |
| VTC3    | YPL019C | r  | Putative polyphosphate synthetase, transcription regulated by the PHO system. Either ULP1 or VTC3 is responsible for the phenotype                        |     | A/C | 1 |                                         |
| WTM2    | YOR229W | cn | Transcriptional modulator involved in meiotic regulation and silencing                                                                                    |     | A   | 1 |                                         |
| YCK3    | YER123W | n  | Protein randomly tagged with HA epitope localizes to nuclear rim and ER in budded and unbudded cells, and also shows some diffuse, faint nuclear staining |     | A   | 1 | Nucleolus enlarged?                     |
| YCR101C | YCR101C | n  | Overproduced protein tagged with V5 epitope at the C terminus localizes to nucleus, and shows staining of the nuclear rim in budded and unbudded cells    |     | A   | 1 |                                         |
| YKR045C | YKR045C | r  | Conserved hypothetical protein                                                                                                                            |     | A   | 1 |                                         |
| YLR271W | YLR271W |    | Yku80-associated                                                                                                                                          |     | C   | 1 | Defect less apparent in unbudded cells. |
| AHC1    | YOR023C | c  | Component of the ADA histone acetyltransferase complex                                                                                                    | ADA | W   |   |                                         |

|      |         |    |                                                                                                                                                                                      |                                                         |   |  |  |
|------|---------|----|--------------------------------------------------------------------------------------------------------------------------------------------------------------------------------------|---------------------------------------------------------|---|--|--|
| ARX1 | YDR101C | n  | Weak similarity to <i>S. pombe</i> Cdb4p, which is a DNA-binding protein that preferentially binds curved DNA. Interact with Nup42 and Nup100                                        |                                                         | W |  |  |
| ASM4 | YDL088C | dn | Component of the karyopherin docking complex of the nuclear pore complex, has a similarity to Nup53p. Suppressor of temperature-sensitive mutations in Cdc2p DNA polymerase $\Delta$ | Karyopherin docking complex of the nuclear pore complex | W |  |  |
| BDF1 | YLR399C | c  | Protein required for sporulation, contains two bromodomain motifs and interacts with histones H3 and H4, antagonizes SIR function and limits heterochromatin spreading               |                                                         | W |  |  |
| BMH1 | YER177W | d  | Cruciform-binding. Associate with cruciform DNA at ARS307 in vivo                                                                                                                    | Cruciform DNA-Binding Protein (Bmh1 and Bmh2)           | W |  |  |
| BMH2 | YDR099W | d  | Cruciform-binding. Associate with cruciform DNA at ARS307 in vivo                                                                                                                    | Cruciform DNA-Binding Protein (Bmh1 and Bmh2)           | W |  |  |

|      |         |   |                                                                                                                                                                       |  |   |  |  |
|------|---------|---|-----------------------------------------------------------------------------------------------------------------------------------------------------------------------|--|---|--|--|
| BOI2 | YER114C | r | Protein which binds Bem1p and contains a proline-rich sequence, an SH3 domain, and a pleckstrin homology domain. Defects in bud formation and maintenance of polarity |  | W |  |  |
| BRE1 | YDL074C | c | Required for ubiquitination of histone H2B (Htb1p and Htb2p), silencing at the telomere, and histone H3 (Hht1p and Hht2p) methylation at lys4 and lys79               |  | W |  |  |
| BUB1 | YGR188C | d | Ser/Thr protein kinase                                                                                                                                                |  | W |  |  |
| CAP1 | YKL007W | r | Addition of actin subunits; mutant has aberrant cell morphology                                                                                                       |  | W |  |  |
| CBF1 | YJR061W | r | Basic helix-loop-helix (bHLH) kinetochore protein which binds to centromeric element CDE1, required for chromosome stability and for methionine prototrophy           |  | W |  |  |
| CKA1 | YIL035C | d | Phosphorylates Top2 and modify its activity                                                                                                                           |  | W |  |  |
| CKA2 | YOR061W | d | Phosphorylates Top2 and modify its activity                                                                                                                           |  | W |  |  |
| CKB1 | YGL019W | d | Phosphorylates Top2 and modify its activity                                                                                                                           |  | W |  |  |
| CKB2 | YOR039W | d | Phosphorylates Top2 and modify its activity                                                                                                                           |  | W |  |  |
| CLB6 | YGR109C | d | Cyclin, B-type                                                                                                                                                        |  | W |  |  |

|      |         |   |                                                                                                                                                                                                                                                    |                      |   |  |  |
|------|---------|---|----------------------------------------------------------------------------------------------------------------------------------------------------------------------------------------------------------------------------------------------------|----------------------|---|--|--|
| CSM3 | YMR048W | d | Checkpoint; partially defective in cohesion.                                                                                                                                                                                                       |                      | W |  |  |
| CUE1 | YMR264W | y | Ubiquitination                                                                                                                                                                                                                                     |                      | W |  |  |
| DDC1 | YPL194W | d | Subunit of 9-1-1 checkpoint specific molecular clamp                                                                                                                                                                                               | 9-1-1 complex        | W |  |  |
| DIN7 | YDR263C | r | DNA damage induced; endonuclease located in the mitochondrial inner membrane; stabilizes mitochondrial genome; homology to Exo1p                                                                                                                   |                      | W |  |  |
| DLS1 | YJL065C | c | Subunit of ISW2- $\gamma$ CHRAC chromatin accessibility complex along with Itc1p, Isw2p, and Dpb4p; involved in inheritance of telomeric silencing; telomeric silencing is enhanced in <i>dls1</i> $\Delta$ mutant; has a weak similarity to Dpb3p | ISW2/ $\gamma$ CHRAC | W |  |  |
| DOT1 | YDR440W | c | Histone H3 methyltransferase specific for Lys79 that is involved in silencing at telomeres and others.                                                                                                                                             |                      | W |  |  |
| DOT5 | YIL010W | c | Nuclear thio-peroxidase involved in derepression of telomeric silencing                                                                                                                                                                            |                      | W |  |  |
| DOT6 | YER088C | c | Protein involved in derepression of telomeric silencing                                                                                                                                                                                            |                      | W |  |  |

|       |         |    |                                                                                                                                                                                                                              |                                            |   |  |  |
|-------|---------|----|------------------------------------------------------------------------------------------------------------------------------------------------------------------------------------------------------------------------------|--------------------------------------------|---|--|--|
| DPB3  | YBR278W | cd | Third-largest subunit of DNA polymerase II (DNA polymerase epsilon), required to maintain fidelity of chromosomal replication and also for inheritance of telomeric silencing                                                | DNA polymerase II (DNA polymerase epsilon) | W |  |  |
| DPB4  | YDR121W | cd | Shared subunit of DNA polymerase (II) epsilon and of ISW2/yCHRAC chromatin accessibility complex; involved in both chromosomal DNA replication and in inheritance of telomeric silencing                                     | DNA polymerase II (DNA polymerase epsilon) | W |  |  |
| DSE2  | YHR143W | rn | Daughter cell-specific secreted protein with similarity to glucanases, degrades cell wall from the daughter side causing daughter to separate from mother; expression is repressed by cAMP                                   |                                            | W |  |  |
| DUN1  | YDL101C | c  | Cell cycle checkpoint serine-threonine kinase                                                                                                                                                                                |                                            | W |  |  |
| ECM11 | YDR446W | d  | Nonessential protein apparently involved in meiosis, GFP fusion protein is present in discrete clusters in the nucleus throughout mitosis; may be involved in maintaining chromatin structure; interact with Cdc6 in2-hybrid |                                            | W |  |  |



|       |         |    |                                                                                                                                                                                 |  |   |  |                                          |
|-------|---------|----|---------------------------------------------------------------------------------------------------------------------------------------------------------------------------------|--|---|--|------------------------------------------|
| EMP70 | YLR083C | r  | Protein whose 24-kD cleavage product is found in endosome-enriched membrane fractions, predicted to be a transmembrane protein                                                  |  | W |  |                                          |
| EPS1  | YIL005W | r  | Pdi1p (protein disulfide isomerase)-related protein involved in endoplasmic reticulum retention of resident ER proteins                                                         |  | W |  | Poor culture growth with many dead cells |
| ESC1  | YMR219W | cn | Protein localized to the nuclear periphery, involved in telomeric silencing; interacts with PAD4-domain of Sir4p                                                                |  | W |  |                                          |
| ESC8  | YOL017W | c  | Protein involved in telomeric and mating-type locus silencing, interacts with Sir2p and also interacts with the Gal11p, which is a component of the RNA pol II mediator complex |  | W |  |                                          |
| EST2  | YLR318W | t  | Catalytic subunit of the telomerase                                                                                                                                             |  | W |  | Very sick                                |
| EXG1  | YLR300W | r  | Exo- $\beta$ -1,3-glucanase (I/II), major isoform                                                                                                                               |  | W |  |                                          |
| FKH1  | YIL131C | cd | Forkhead protein, involved in transcriptional silencing, cell morphology and cell cycle                                                                                         |  | W |  |                                          |
| FUN30 | YAL019W | cd | Protein important for chromosome integrity and segregation; Snf2 homolog                                                                                                        |  | W |  |                                          |

|      |         |    |                                                                                                                      |              |   |  |                                                                                                        |
|------|---------|----|----------------------------------------------------------------------------------------------------------------------|--------------|---|--|--------------------------------------------------------------------------------------------------------|
| GDE1 | YPL110C | r  | Glycerophosphocholine (GroPCho) phosphodiesterase                                                                    |              | W |  |                                                                                                        |
| GFD1 | YMR255W | n  | Protein of the nuclear pore complex                                                                                  |              | W |  |                                                                                                        |
| GPB1 | YOR371C | r  | G protein subunit mimic and signalling effector                                                                      |              | W |  | Some sick-looking cells had abnormal nuclear morphology.<br>Could be (partially) defective in mitosis. |
| GTT3 | YEL017W | n  | Protein of unknown function with a possible role in glutathione metabolism; localizes to nuclear periphery           |              | W |  |                                                                                                        |
| HAT2 | YEL056W | c  | Subunit of the major yeast histone acetyltransferase                                                                 |              | W |  |                                                                                                        |
| HCS1 | YKL017C | d  | DNA helicase A                                                                                                       |              | W |  |                                                                                                        |
| HF11 | YPL254W | r  | Transcriptional coactivator                                                                                          |              | W |  |                                                                                                        |
| HHO1 | YPL127C | c  | Histone H1 protein                                                                                                   |              | W |  |                                                                                                        |
| HIR1 | YBL008W | c  | Histone transcription regulator                                                                                      | Hir          | W |  |                                                                                                        |
| HOP2 | YGL033W | d  | Protein required for pairing of homologous chromosomes                                                               |              | W |  |                                                                                                        |
| HOS1 | YPR068C | c  | Putative class I histone deacetylase (HDAC), involved in histone deacetylation at rDNA repeats                       |              | W |  |                                                                                                        |
| HOS2 | YGL194C | c  | Putative histone deacetylase                                                                                         | Set3 complex | W |  |                                                                                                        |
| HOS4 | YIL112W | c  | Subunit of SET3 complex including two histone deacetylases, Hos2 and Hst1, meiotic-specific repressor of sporulation | Set3 complex | W |  |                                                                                                        |
| HPC2 | YBR215W | cd | Cell cycle regulatory protein                                                                                        |              | W |  |                                                                                                        |
| HST3 | YOR025W | c  | Silencing protein                                                                                                    |              | W |  |                                                                                                        |

|      |         |    |                                                                                   |              |   |  |                                                                                          |
|------|---------|----|-----------------------------------------------------------------------------------|--------------|---|--|------------------------------------------------------------------------------------------|
| HST4 | YDR191W | c  | Member of the Sir2p family of putative NAD-dependent histone deacetylases         |              | W |  |                                                                                          |
| HTZ1 | YOL012C | c  | Evolutionarily conserved member of the histone H2A F/Z family of histone variants |              | W |  |                                                                                          |
| IMD3 | YLR432W | t  | Inosine monophosphate dehydrogenase, catalyzes the first step of GMP biosynthesis |              | W |  |                                                                                          |
| IPK1 | YDR315C | n  | Inositol 1,3,4,5,6-pentakisphosphate 2-kinase (IP5 2-kinase)                      |              | W |  |                                                                                          |
| ISW1 | YBR245C | c  | ATPase component of a four subunit chromatin remodeling complex                   | Isw1 complex | W |  |                                                                                          |
| ISW2 | YOR304W | c  | ATPase component of a two subunit chromatin remodeling complex                    | Isw2 complex | W |  | Most cells had aberrant nuclear morphology                                               |
| ITC1 | YGL133W | c  | Subunit of Isw2 chromatin remodeling complex                                      | Isw2 complex | W |  |                                                                                          |
| KAR3 | YPR141C | d  | Kinesin-related protein; required for establishment of cohesion                   |              | W |  | Most cells are enlarged. In addition, nuclear shape is aberrant in dumbbell-shaped cells |
| LIF1 | YGL090W | d  | DNA ligase IV interacting factor                                                  |              | W |  |                                                                                          |
| LOS1 | YKL205W | cn | Pre-tRNA splicing protein; localizes to nuclear pore                              |              | W |  |                                                                                          |
| MAD2 | YJL030W | d  | Spindle-assembly checkpoint protein                                               |              | W |  |                                                                                          |
| MAF1 | YDR005C | r  | Protein required for sorting of Mod5p                                             |              | W |  |                                                                                          |

|             |         |   |                                                                                                                                        |  |   |  |                    |
|-------------|---------|---|----------------------------------------------------------------------------------------------------------------------------------------|--|---|--|--------------------|
| MDL1        | YLR118W | r | Half-size ABC transporter, mitochondrial                                                                                               |  | W |  |                    |
| MDT1 (PIN4) | YBL051C | d | FHA1 domain-interacting protein modulates DNA damage tolerance and G(2)/M cell cycle progression; synthetic growth defect with ctf18   |  | W |  |                    |
| MGA2        | YIR033W | c | May be involved in the remodeling chromatin structure                                                                                  |  | W |  |                    |
| MLP1        | YKR095W | d | Myosin-like protein related to Uso1p; reported to be required for telomere position                                                    |  | W |  |                    |
| MLP2        | YIL149C |   | Protein involved in translocation of macromolecules between the nucleoplasm and the NPC; reported to be required for telomere position |  | W |  |                    |
| MRC1        | YCL061C | d | Mediator of the replication checkpoint; partially defective in cohesion                                                                |  | W |  |                    |
| MSB1        | YOR118W | r | Morphogenesis-related protein                                                                                                          |  | W |  |                    |
| MUP1        | YGR055W | r | High affinity methionine permease                                                                                                      |  | W |  |                    |
| NAT1        | YDL040C | c | Protein N-acetyltransferase subunit; weak similarity to Tetrahymena telomerase component p95                                           |  | W |  |                    |
| NDJ1        | YOL104C | r | Meiotic telomere protein                                                                                                               |  | W |  |                    |
| NEM1        | YHR004C | n | Protein required for nuclear morphology                                                                                                |  | W |  | Enlarged nucleolus |

|       |         |    |                                                                                                                                                      |                                    |   |  |  |
|-------|---------|----|------------------------------------------------------------------------------------------------------------------------------------------------------|------------------------------------|---|--|--|
| NFI1  | YOR156C |    | Interacts with Cdc12p in 2-hybrid assay; Protein involved in SUMO/Smt3p conjugation of a subset of yeast proteins, potential in vivo target of Ulp2p |                                    | W |  |  |
| NGG1  | YDR176W | c  | General transcriptional adaptor or coactivator                                                                                                       |                                    | W |  |  |
| NHP6A | YPR052C | c  | Nonhistone chromosomal protein related to mammalian HMG1                                                                                             |                                    | W |  |  |
| NMA2  | YGR010W | c  | Nicotinate-nucleotide adenyltransferase                                                                                                              |                                    | W |  |  |
| NPY1  | YGL067W | r  | NADH pyrophosphatase I of the Nudix family of hydrolases, has a peroxisomal targeting signal                                                         |                                    | W |  |  |
| NUP2  | YLR335W | cn | Nuclear pore protein                                                                                                                                 |                                    | W |  |  |
| NUT1  | YGL151W | c  | Negative transcription regulator from artificial reporters                                                                                           | RNA polymerase II mediator complex | W |  |  |
| PBP2  | YBR233W | cl | PAB1-binding protein                                                                                                                                 |                                    | W |  |  |
| PCL6  | YER059W | r  | Cyclin-like protein interacting with Pho85p                                                                                                          |                                    | W |  |  |
| PES4  | YFR023W | d  | DNA-directed DNA polymerase epsilon suppressor                                                                                                       |                                    | W |  |  |
| PEX19 | YDL065C |    | Protein required for biogenesis of peroxisomes - peroxin; interact with Yku70                                                                        |                                    | W |  |  |
| PHB1  | YGR132C | r  | Prohibitin, antiproliferative protein                                                                                                                |                                    | W |  |  |
| PHB2  | YGR231C | r  | Prohibitin                                                                                                                                           |                                    | W |  |  |

|       |         |     |                                                                                                         |                                   |   |  |                                  |
|-------|---------|-----|---------------------------------------------------------------------------------------------------------|-----------------------------------|---|--|----------------------------------|
| PHO4  | YFR034C | c   | Transcription factor                                                                                    |                                   | W |  | Perhaps defective in cytokinesis |
| PNC1  | YGL037C | c   | NAD(+) salvage pathway gene,<br>pyrazinamidase and nicotinamidase                                       |                                   | W |  |                                  |
| PPR1  | YLR014C | c   | Transcription factor regulating<br>pyrimidine pathway                                                   |                                   | W |  |                                  |
| PRM3  | YPL192C | n   | Pheromone-regulated protein required<br>for karyogamy                                                   |                                   | W |  |                                  |
| PSD2  | YGR170W | r   | Phosphatidylserine decarboxylase 2                                                                      |                                   | W |  |                                  |
| PSP1  | YDR505C | d   | High copy suppressor of ts mutations in<br>DNA polymerase alpha                                         |                                   | W |  |                                  |
| PTK2  | YJR059W | cn  | Protein involved in polyamine uptake                                                                    |                                   | W |  |                                  |
| PUS6  | YGR169C | r   | tRNA:Psi 31-synthase                                                                                    |                                   | W |  |                                  |
| QRI8  | YMR022W | c   | E2 ubiquitin-conjugation enzyme                                                                         |                                   | W |  |                                  |
| RAD17 | YOR368W | dlr | DNA damage checkpoint control<br>protein                                                                | 9-1-1 complex                     | W |  |                                  |
| RAD18 | YCR066W | c   | DNA repair protein                                                                                      |                                   | W |  |                                  |
| RAD24 | YER173W | dr  | Cell cycle checkpoint protein                                                                           |                                   | W |  |                                  |
| RAD30 | YDR419W | d   | DNA repair protein                                                                                      |                                   | W |  |                                  |
| RAD50 | YNL250W | dl  | DNA repair protein                                                                                      | MRX                               | W |  |                                  |
| RDR1  | YOR380W | c   | Transcriptional repressor (zinc cluster<br>protein), Repressor of drug resistance;<br>subtelomeric gene |                                   | W |  |                                  |
| RPD3  | YNL330C | c   | Histone deacetylase B                                                                                   | Rpd3-Sin3p histone<br>deacetylase | W |  |                                  |

|       |         |    |                                                                                                                                    |                                         |   |  |                    |
|-------|---------|----|------------------------------------------------------------------------------------------------------------------------------------|-----------------------------------------|---|--|--------------------|
| RSN1  | YMR266W | r  | Over-expression rescues sro7/sop1 in NaCl                                                                                          |                                         | W |  |                    |
| RUB1  | YDR139C | d  | Ubiquitin-like protein                                                                                                             |                                         | W |  |                    |
| SAC7  | YDR389W | c  | Suppressor of actin mutation                                                                                                       |                                         | W |  |                    |
| SAG1  | YJR004C | r  | $\alpha$ -agglutinin                                                                                                               |                                         | W |  |                    |
| SAP30 | YMR263W | c  | Subunit of the histone deacetylase B complex                                                                                       | Rpd3-Sin3p histone deacetylase          | W |  |                    |
| SAS2  | YMR127C | c  | Protein involved in silencing at HMR                                                                                               | SAS complex                             | W |  |                    |
| SAS3  | YBL052C | c  | Silencing protein                                                                                                                  | SAS complex                             | W |  |                    |
| SAS4  | YDR181C | c  | Protein involved in silencing at telomeres                                                                                         | SAS complex                             | W |  |                    |
| SDS3  | YIL084C | c  | Transcriptional regulator                                                                                                          | Rpd3p-Sin3p histone deacetylase complex | W |  | Nucleolus enlarged |
| SET2  | YJL168C | c  | Histone methyltransferase with a role in transcriptional elongation                                                                |                                         | W |  |                    |
| SET3  | YKR029C | c  | SET3 complex includes two histone deacetylases, Hos2 and Hst1, and is a meiotic-specific repressor of the sporulation gene program | Set3 complex                            | W |  |                    |
| SGS1  | YMR190C | dr | DNA helicase                                                                                                                       |                                         | W |  |                    |
| SIF2  | YBR103W | c  | Sir4p interacting protein                                                                                                          |                                         | W |  |                    |
| SIM1  | YIL123W | dy | Protein involved in cell cycle regulation and aging                                                                                |                                         | W |  |                    |
| SKN7  | YHR206W | dr | Transcription factor                                                                                                               |                                         | W |  |                    |

|       |         |    |                                                                                                                         |                                                |   |  |                                                                        |
|-------|---------|----|-------------------------------------------------------------------------------------------------------------------------|------------------------------------------------|---|--|------------------------------------------------------------------------|
| SNF11 | YDR073W | d  | Component of SWI–SNF transcription activator complex                                                                    | SWI–SNF global transcription activator complex | W |  |                                                                        |
| SNF2  | YOR290C | d  | Component of SWI–SNF global transcription activator complex                                                             | SWI–SNF global transcription activator complex | W |  |                                                                        |
| SNF6  | YHL025W | d  | Global transcription activator                                                                                          | SWI–SNF global transcription activator complex | W |  |                                                                        |
| SNG1  | YGR197C | r  | Probable transporter conferring resistance to nitrosoguanidine (MNNG) when over-expressed - unknown biological function |                                                | W |  |                                                                        |
| SNO2  | YNL334C | r  | Protein is related with B(1) biosynthesis during the exponential phase                                                  |                                                | W |  |                                                                        |
| SNT1  | YCR033W | r  | Component of meiotic-specific repressor of the sporulation                                                              | Set3 complex                                   | W |  | Most cells have large aberrant shape; nucleolus could be also enlarged |
| SOH1  | YGL127C | cl | Allows hpr1 null mutant to grow at 37 deg; mutant has shorter telomeres                                                 | RNA polymerase II mediator complex             | W |  |                                                                        |
| SPP1  | YPL138C | c  | Subunit of the Set1/COMPASS complex, which methylates histone H3 on lysine 4                                            | Set1–COMPASS complex                           | W |  |                                                                        |



|             |         |    |                                                                                                                                                                                 |                      |   |  |                                     |
|-------------|---------|----|---------------------------------------------------------------------------------------------------------------------------------------------------------------------------------|----------------------|---|--|-------------------------------------|
| SPT20       | YOL148C | c  | Member of the TBP class of SPT proteins that alter transcription site selection                                                                                                 |                      | W |  |                                     |
| SPT3        | YDR392W | c  | General transcriptional adaptor or co-activator                                                                                                                                 | SAGA and SLIK.       | W |  | Cells accumulate as dumbbell shape. |
| SPT8        | YLR055C | c  | Transcriptional adaptor or co-activator                                                                                                                                         | SAGA                 | W |  | Cells accumulate as dumbbell shape. |
| SRS2 (HPR5) | YJL092W | dr | ATP-dependent DNA helicase                                                                                                                                                      |                      | W |  |                                     |
| SSM4        | YIL030C | n  | Protein involved in mRNA turnover                                                                                                                                               |                      | W |  |                                     |
| STM1        | YLR150W | dl | Specific affinity for guanine-rich quadruplex nucleic acids                                                                                                                     |                      | W |  |                                     |
| STO1        | YMR125W | r  | Large subunit of the nuclear cap-binding protein complex CBC; Suppressor of Top1; plasmid DNA isolated from the mutant is significantly more negatively supercoiled than normal |                      | W |  |                                     |
| SWD1        | YAR003W | c  | Subunit of the COMPASS complex, which methylates histone H3 on lysine 4 and is required in transcriptional silencing near telomeres                                             | Set1/COMPASS complex | W |  |                                     |
| SWD3        | YBR175W | c  | Subunit of the COMPASS complex, which methylates histone H3 on lysine 4                                                                                                         | Set1/COMPASS complex | W |  |                                     |
| SWR1        | YDR334W | r  | DEAH-box protein, putative RNA helicase                                                                                                                                         |                      | W |  |                                     |
| SXM1        | YDR395W | cn | Putative beta-karyopherin                                                                                                                                                       |                      | W |  |                                     |

|              |         |    |                                                                                                                                                  |     |   |  |                                                 |
|--------------|---------|----|--------------------------------------------------------------------------------------------------------------------------------------------------|-----|---|--|-------------------------------------------------|
| TCO89 (SHD7) | YPL180W | dr | TOR complex 1, 89-kD subunit                                                                                                                     |     | W |  |                                                 |
| TEA1         | YOR377W | r  | TY1 enhancer activator                                                                                                                           |     | W |  |                                                 |
| TOF1         | YNL273W | cd | Topoisomerase I interacting factor 1, DNA replication and damage checkpoint                                                                      |     | W |  |                                                 |
| TOP1         | YOL006C | d  | DNA topoisomerase I                                                                                                                              |     | W |  |                                                 |
| TOP3         | YLR234W | d  | DNA topoisomerase III                                                                                                                            |     | W |  |                                                 |
| TPA1         | YER049W | c  | Protein of unknown function; localized to nucleus; has a role in translation termination efficiency, mRNA poly(A) tail length and mRNA stability |     | W |  |                                                 |
| TPO2         | YGR138C | r  | Proposed vacuolar polyamine transporter                                                                                                          |     | W |  |                                                 |
| TRF5         | YNL299W |    | Nuclear division protein                                                                                                                         |     | W |  |                                                 |
| TRM3         | YDL112W | r  | tRNA (guanosine-2'-O)-methyltransferase                                                                                                          |     | W |  | Some swollen cells have aberrant nuclear shape. |
| UIP5         | YKR044W | r  | Ulp1 Interacting integral membrane protein                                                                                                       |     | W |  |                                                 |
| UME1         | YPL139C | cn | Negative regulator of meiosis                                                                                                                    |     | W |  |                                                 |
| WTM1         | YOR230W | cn | Transcriptional modulator                                                                                                                        |     | W |  |                                                 |
| XRS2         | YDR369C | dl | DNA repair protein                                                                                                                               | MRX | W |  |                                                 |
| YAP5         | YIR018W | d  | Protein involved in transcription activation                                                                                                     |     | W |  |                                                 |
| YBR063C      | YBR063C | d  | Conserved hypothetical protein; interact with MRX                                                                                                |     | W |  |                                                 |
| YBR242W      | YBR242W | r  | Protein of unknown function localized to cytoplasm and nucleus                                                                                   |     | W |  |                                                 |

|           |           |    |                                                                              |      |   |  |  |
|-----------|-----------|----|------------------------------------------------------------------------------|------|---|--|--|
| YDC1      | YPL087W   | r  | Alkaline dihydroceramidase                                                   |      | W |  |  |
| YDR128W   | YDR128W   | d  | Protein of unknown function localized to vacuolar membrane; Yku80-associated |      | W |  |  |
| YEA4      | YEL004W   | r  | Uridine diphosphate-N-acetylglucosamine transporter localized to ER          |      | W |  |  |
| YGL080W   | YGL080W   | r  | Found in mitochondrial proteome                                              |      | W |  |  |
| YGR111W   | YGR111W   | r  | Protein of unknown function localized to cytoplasm and nucleus               |      | W |  |  |
| YGRCTy1-2 | YGRCTy1-2 | r  | Full length Ty1                                                              |      | W |  |  |
| YHL046C   | YHL046C   | n  | Strong similarity to members of the Srp1p/Tip1p family                       |      | W |  |  |
| YKE2      | YLR200W   | dn | Gim complex component; synthetic growth defect with ctf18                    |      | W |  |  |
| YLR247C   | YLR247C   | c  | Protein involved in DNA topology                                             |      | W |  |  |
| YNG1      | YOR064C   | c  | Component of NuA3 histone acetyltransferase complex                          | NuA3 | W |  |  |
| YNL022C   | YNL022C   | n  | Protein of unknown function localized to cytoplasm and nucleus               |      | W |  |  |
| YNR063W   | YNR063W   | r  | Weak similarity to CYC1/CYP3 transcription activator                         |      | W |  |  |
| YOR051C   | YOR051C   | n  | Protein of unknown function localized to nucleus                             |      | W |  |  |
| YOR154W   | YOR154W   | c  | Protein of unknown function; putative SUN-like domain protein                |      | W |  |  |

|      |         |   |                                                                                                                         |  |   |  |  |
|------|---------|---|-------------------------------------------------------------------------------------------------------------------------|--|---|--|--|
| YTA6 | YPL074W | r | Putative ATPase of the CDC48/PAS1/SEC18 (AAA) family, localized to the cortex of mother cells but not to daughter cells |  | W |  |  |
|------|---------|---|-------------------------------------------------------------------------------------------------------------------------|--|---|--|--|

c, chromatin organization (remodeling, assembly, histone modification, and silencing); d, DNA maintenance; l, telomere length; n, localization to nuclear rim, pore-related; r, recombination control; t, telomere binding protein (experimentally confirmed or putative); y, other cell cycle-related (including cohesion).

Table S2. Result of telomere localization screening

| Type    | Strain                  | G1                   |      |                       |                       | S        |      |                       |                       |
|---------|-------------------------|----------------------|------|-----------------------|-----------------------|----------|------|-----------------------|-----------------------|
|         |                         | % zone 1             | n    | P-value against       |                       | % zone 1 | n    | P-value against       |                       |
|         |                         |                      |      | Random                | WT                    |          |      | Random                | WT                    |
| Control | WT                      | 68.5                 | 295  | $6.3 \times 10^{-11}$ | 1.000                 | 67.2     | 336  | $1.9 \times 10^{-10}$ | 1.000                 |
|         | <i>sir4</i> $\Delta$    | 46.0                 | 124  | 0.010                 | $1.5 \times 10^{-5}$  | 58.0     | 91   | $1.8 \times 10^{-6}$  | 0.008                 |
|         | <i>yku70</i> $\Delta$   | 54.0                 | 184  | $3.4 \times 10^{-10}$ | $1.5 \times 10^{-4}$  | 55.0     | 87   | $3.5 \times 10^{-6}$  | $2.5 \times 10^{-5}$  |
| A       | <i>ace2</i> $\Delta^a$  | ND                   |      |                       |                       | ND       |      |                       |                       |
|         | <i>gbp2</i> $\Delta$    | 71.0                 | 31   | $5.0 \times 10^{-5}$  | 0.772                 | 77.8     | 36   | $1.0 \times 10^{-7}$  | 0.406                 |
|         | <i>imd4</i> $\Delta$    | 71.0                 | 31   | $1.6 \times 10^{-5}$  | 0.103                 | 69.4     | 36   | $1.5 \times 10^{-5}$  | 0.571                 |
|         | <i>spe1</i> $\Delta^b$  | ND                   |      |                       |                       | ND       |      |                       |                       |
|         | <i>asf1</i> $\Delta$    | 67.4                 | 46   | $2.3 \times 10^{-6}$  | 0.052                 | 43.1     | 51   | 0.113                 | $4.7 \times 10^{-4}$  |
| B       | <i>bre2</i> $\Delta$    | 71.0                 | 24   | $3.8 \times 10^{-4}$  | 0.559                 | 72.0     | 29   | $4.2 \times 10^{-5}$  | 0.507                 |
|         | <i>csm4</i> $\Delta$    | 56.8                 | 37   | 0.008                 | 0.315                 | 59       | 39   | $3.0 \times 10^{-3}$  | 0.258                 |
|         | <i>ctf4</i> $\Delta^c$  | ND                   |      |                       |                       | ND       |      |                       |                       |
|         | <i>ctf18</i> $\Delta$   | 40.2                 | 247  | $4.3 \times 10^{-5}$  | $3.1 \times 10^{-73}$ | 51.9     | 212  | $1.2 \times 10^{-21}$ | $1.2 \times 10^{-18}$ |
|         | <i>mre11</i> $\Delta$   | 59.4                 | 32   | 0.007                 | 0.409                 | 47.3     | 55   | 0.009                 | 0.001                 |
|         | <i>pgd1</i> $\Delta$    | 37.9                 | 112  | 0.076                 | $3.5 \times 10^{-11}$ | 44.8     | 95   | 0.123                 | $6.2 \times 10^{-7}$  |
|         | <i>pha23</i> $\Delta$   | 63.5                 | 52   | $2.4 \times 10^{-5}$  | 0.927                 | 69.0     | 29   | $2.5 \times 10^{-4}$  | 0.983                 |
|         | <i>rad27</i> $\Delta^d$ | ND                   |      |                       |                       | ND       |      |                       |                       |
|         | <i>rrm3</i> $\Delta$    | 45.2                 | 62   | 0.161                 | 0.002                 | 38.4     | 86   | 0.141                 | $2.0 \times 10^{-8}$  |
|         | <i>rsc2</i> $\Delta$    | 67.4                 | 43   | $2.9 \times 10^{-4}$  | 0.354                 | 63.6     | 44   | $9.6 \times 10^{-5}$  | 0.515                 |
|         | <i>sir3</i> $\Delta$    | 56.5                 | 46   | 0.004                 | 0.312                 | 54.5     | 44   | 0.004                 | 0.070                 |
|         | <i>swi3</i> $\Delta^e$  | ND                   |      |                       |                       | ND       |      |                       |                       |
|         | <i>tel1</i> $\Delta$    | 48.1                 | 54   | 0.029                 | 0.002                 | 63.0     | 46   | $9.3 \times 10^{-5}$  | 0.800                 |
|         | <i>yku80</i> $\Delta$   | 63.9                 | 152  | $5.1 \times 10^{-14}$ | 0.084                 | 65.8     | 196  | $6.0 \times 10^{-21}$ | 0.461                 |
|         | A/B                     | <i>sic1</i> $\Delta$ | 74.2 | 31                    | $8.0 \times 10^{-6}$  | 0.487    | 50.0 | 42                    | 0.017                 |
| A/C     | <i>iji1</i> $\Delta$    | 52.3                 | 65   | 0.003                 | 0.031                 | 57.6     | 39   | 0.012                 | 0.477                 |
| B/C     | <i>elp3</i> $\Delta$    | 63.9                 | 36   | $3.1 \times 10^{-4}$  | 0.423                 | 69.0     | 29   | $2.5 \times 10^{-4}$  | 0.752                 |
|         | <i>elp4</i> $\Delta$    | 45.7                 | 35   | 0.105                 | 0.008                 | 71.9     | 32   | $2.2 \times 10^{-5}$  | 0.680                 |

ND, not determined.

<sup>a</sup>Because of the cytokinesis defect of the *ace2* $\Delta$  mutant in the W303 strain background (Voth, W.P., A.E. Olsen, M. Sbia, K.H. Freedman, and D.J. Stillman. 2005. *Eukaryot. Cell.* 4:1018–1028.), the mutant strain was not suitable for microscopic analysis.

<sup>b</sup>The GFP-tagged *spe1* $\Delta$  mutant strain ceased to grow in the culture for microscopic observation as unbudded cells. The phenotype resembled the known phenotype of *spe1* $\Delta$  mutant under polyamine starvation (Balasundaram, D., C.W. Tabor, and H. Tabor. 1991. *Proc. Natl. Acad. Sci. USA.* 88:5872–5876.).

<sup>c</sup>We did not examine the *ctf4* $\Delta$  mutant because the mutant cells were too sick to be examined under a microscope. The *ctf4* $\Delta$  mutant is known to have a shorter life span than WT (Hoopes, L.L., M. Budd, W. Choe, T. Weitao, and J.L. Campbell. 2002. *Mol. Cell. Biol.* 22:4136–4146.). In fact, the *ctf4* $\Delta$  culture contained large number of dead cells (unpublished data).

<sup>d</sup>In the *rad27* $\Delta$  mutant, the copy number of the *lacO* operator array, which is essential for chromosomal GFP dot observation, seemed to decline very rapidly during cultivation, probably due to the hyper-recombination phenotype of the *rad27* $\Delta$  mutant (Tishkoff, D.X., N. Filosi, G.M. Gaida, and R.D. Kolodner. 1997. *Cell.* 88:253–263.).

<sup>e</sup>We were not able to construct the *swi3* $\Delta$  mutant in the chromosomal GFP dot strain. *SWI3* may be required for expression of the marker gene (*kanMX4*) from the *TEF* promoter.

Table S3. **Yeast strains**

| <b>Name</b> | <b>Relevant genotype</b>                                                                                   | <b>Reference</b>       |
|-------------|------------------------------------------------------------------------------------------------------------|------------------------|
| BY4741      | <i>MATa his3Δ1 leu2Δ0 met15Δ0 ura3Δ0</i>                                                                   | Brachmann et al., 1998 |
| GA-1320     | W303-1A <i>his3-11,15::GFP-LacI-HIS3 NUP49-GFP</i>                                                         | Heun et al., 2001      |
| GA-1459     | GA-1320 <i>TELVI-R::lacO-lexA-TRP</i>                                                                      | Hediger et al., 2002   |
| GA-1985     | GA-1420 <i>TELXIV-L::lacO-lexA-TRP1</i>                                                                    | Hediger et al., 2002   |
| GA-1986     | GA-1320 <i>TELVIII-L::lacO-lexA-TRP</i>                                                                    | Hediger et al., 2002   |
| HMY57       | W303-1A ( <i>hht2-hhf2</i> )Δ:: <i>kanMX3</i>                                                              | Masumoto et al., 2005  |
| HMY133      | W303-1A ( <i>hht1-hhf1</i> )Δ:: <i>LEU2 (hht2-hhf2)Δ::kanMX</i><br>[pHMO27 ( <i>HHT1 HHF1 TRP1</i> )]      | Masumoto et al., 2005  |
| HMY135      | W303-1A ( <i>hht1-hhf1</i> )Δ:: <i>LEU2 (hht2-hhf2)Δ::kanMX</i><br>[pHM147 ( <i>hht1-K56Q HHF1 TRP1</i> )] | Masumoto et al., 2005  |
| HMY140      | W303-1A <i>trp1-1::(hht1-K56R HHF1)::TRP1 (hht1-hhf1)Δ::LEU2 (hht2-hhf2)Δ::kanMX3</i>                      | Masumoto et al., 2005  |
| HMY152      | W303-1A <i>trp1-1::(HHT1 HHF1)::TRP1 (hht1-hhf1)Δ::LEU2 (hht2-hhf2)Δ::kanMX</i>                            | Masumoto et al., 2005  |
| SHY114      | GA-1985 <i>cf18Δ::kanMX</i>                                                                                | Hiraga et al., 2006    |
| SHY155      | GA-1985 <i>yku70Δ::URA3</i>                                                                                | This study             |
| SHY158      | GA-1985 <i>sir4Δ::kanMX</i>                                                                                | This study             |
| SHY173      | GA-1985 <i>asf1Δ::kanMX</i>                                                                                | This study             |
| SHY174      | GA-1985 <i>bre2Δ::kanMX</i>                                                                                | This study             |
| SHY176      | GA-1985 <i>rrm3Δ::kanMX</i>                                                                                | This study             |
| SHY179      | GA-1985 <i>sic1Δ::kanMX</i>                                                                                | This study             |
| SHY180      | GA-1985 <i>rsc2Δ::kanMX</i>                                                                                | This study             |
| SHY182      | GA-1985 <i>sir3Δ::kanMX</i>                                                                                | This study             |
| SHY184      | GA-1985 <i>mre11Δ::kanMX</i>                                                                               | This study             |
| SHY185      | GA-1985 <i>ace2Δ::kanMX</i>                                                                                | This study             |
| SHY186      | GA-1985 <i>iji1Δ::kanMX</i>                                                                                | This study             |
| SHY187      | GA-1985 <i>yku80Δ::kanMX</i>                                                                               | This study             |
| SHY188      | GA-1985 <i>elp4Δ::kanMX</i>                                                                                | This study             |
| SHY189      | GA-1985 <i>tel1Δ::kanMX</i>                                                                                | This study             |
| SHY191      | GA-1985 <i>csm4Δ::kanMX</i>                                                                                | This study             |
| SHY192      | GA-1985 <i>elp3Δ::kanMX</i>                                                                                | This study             |
| SHY193      | GA-1985 <i>gbp2Δ::kanMX</i>                                                                                | This study             |
| SHY194      | GA-1985 <i>imd4Δ::kanMX</i>                                                                                | This study             |
| SHY195      | GA-1985 <i>pho23Δ::kanMX</i>                                                                               | This study             |
| SHY196      | GA-1985 <i>rtt109Δ::kanMX4</i>                                                                             | This study             |
| SHY219      | GA-1985 <i>pgd1Δ::kanMX</i>                                                                                | This study             |
| SHY227      | GA-1985 <i>vps75Δ::nat1</i>                                                                                | This study             |
| SHY229      | GA-1985 <i>asf1Δ::kanMX4 vps75Δ::nat1</i>                                                                  | This study             |
| SHY234      | W303-1B ( <i>hht2 hhf2</i> )Δ:: <i>kanMX his3-11,15::GFP-LacI-HIS3 TELXIV-L::(256x lacO)::ADE2</i>         | This study             |
| SHY247      | HMY140 <i>his3-11,15::GFP-LacI-HIS3 TELXIV-L::(256x lacO)::ADE2</i><br>[pSH115 ( <i>GFP-NUP49 URA3</i> )]  | This study             |
| SHY248      | HMY152 <i>his3-11,15::GFP-LacI-HIS3 TELXIV-L::(256x lacO)::ADE2</i><br>[pSH115 ( <i>GFP-NUP49 URA3</i> )]  | This study             |
| SHY296.2    | SHY234 [pSH115 ( <i>GFP-NUP49 URA3</i> )]                                                                  | This study             |
| SHY298      | GA-1459 <i>rtt109Δ::kanMX</i>                                                                              | This study             |
| SHY299      | GA-1986 <i>rtt109Δ::kanMX</i>                                                                              | This study             |
| SHY304      | HMY135 <i>his3-11,15::GFP-LacI-HIS3 TELXIV-L::(256x lacO)::ADE2</i><br>[pSH115 ( <i>GFP-NUP49 URA3</i> )]  | This study             |
| SHY310      | HMY133 <i>his3-11,15::GFP-LacI-HIS3 TELXIV-L::(256x lacO)::ADE2</i><br>[pSH115 ( <i>GFP-NUP49 URA3</i> )]  | This study             |
| SBY1        | GA-1320 <i>BCP1-(256x lacO)::TRP1-TFC6</i> (chromosome VI-R)                                               | This study             |
| SBY2        | Identical to SBY1. Different isolate                                                                       | This study             |
| SBY6        | Identical to SBY1. Different isolate                                                                       | This study             |
| SBY39       | SBY1 <i>sir4Δ::kanMX</i>                                                                                   | This study             |
| SBY40       | SBY1 <i>vps75Δ::kanMX</i>                                                                                  | This study             |
| SBY41       | Identical to SBY40. Different isolate                                                                      | This study             |
| SBY42       | Identical to SBY40. Different isolate                                                                      | This study             |
| SBY43       | SBY1 <i>yku70Δ::kanMX</i>                                                                                  | This study             |
| SBY44       | Identical to SBY43. Different isolate                                                                      | This study             |

|       |                                       |            |
|-------|---------------------------------------|------------|
| SBY45 | Identical to SBY43. Different isolate | This study |
| SBY46 | SBY1 <i>sir4Δ::kanMX yku70Δ::URA3</i> | This study |
| SBY47 | Identical to SBY46. Different isolate | This study |
| SBY48 | Identical to SBY46. Different isolate | This study |
| RGY1  | SBY1 <i>rrt109Δ::kanMX</i>            | This study |
| RGY2  | Identical to RGY1. Different isolate  | This study |
| RGY5  | SBY1 <i>asf1Δ::kanMX</i>              | This study |
| RGY6  | Identical to RGY5. Different isolate  | This study |

---

Brachmann, C.B., A. Davies, G.J. Cost, E. Caputo, J. Li, P. Hieter, and J.D. Boeke. 1998. Designer deletion strains derived from *Saccharomyces cerevisiae* S288C: a useful set of strains and plasmids for PCR-mediated gene disruption and other applications. *Yeast*. 14:115–132.

Hediger, F., F.R. Neumann, G. Van Houwe, K. Dubrana, and S.M. Gasser. 2002. Live imaging of telomeres: yKu and Sir proteins define redundant telomere-anchoring pathways in yeast. *Curr. Biol.* 12:2076–2089.

Heun, P., T. Laroche, M.K. Raghuraman, and S.M. Gasser. 2001. The positioning and dynamics of origins of replication in the budding yeast nucleus. *J. Cell. Biol.* 152:385–400.

Hiraga, S., E.D. Robertson, and A.D. Donaldson. 2006. The Ctf18 RFC-like complex positions yeast telomeres but does not specify their replication time. *EMBO J.* 25:1505–1514.

Masumoto, H., D. Hawke, R. Kobayashi, and A. Verreault. 2005. A role for cell-cycle-regulated histone H3 lysine 56 acetylation in the DNA damage response. *Nature*. 436:294–298.

Table S4. **Plasmids**

| <b>Name</b>      | <b>Relevant feature</b>                                    | <b>Reference</b>             |
|------------------|------------------------------------------------------------|------------------------------|
| pAF52            | 256x <i>lacO</i> , <i>TRP1</i>                             | Straight et al., 1996        |
| pAF59            | 256x <i>lacO</i> , <i>LEU2</i>                             | Straight et al., 1996        |
| pAFS135          | GFP- <i>lacI</i> , <i>HIS3</i>                             | Straight et al., 1996        |
| pAG25            | <i>natMX4</i>                                              | Goldstein and McCusker, 1999 |
| pGVH30           | <i>ADE2</i>                                                | Bystricky et al., 2004       |
| pHM027           | <i>HHT1 HHF1 TRP1</i>                                      | Masumoto et al., 2005        |
| pHM147           | <i>hht1-K56Q HHF1 TRP1</i>                                 | Masumoto et al., 2005        |
| pSH114           | Chromosome XIV:18831-19853, 256x <i>lacO</i> , <i>ADE2</i> | This study                   |
| pSH115           | YCplac33 GFP- <i>NUP49</i> , <i>URA3</i>                   | This study                   |
| pUN100-GFP-NUP49 | GFP- <i>NUP49</i> , <i>LEU2</i>                            | Belgareh and Doye, 1997      |
| YCp-GFP-Rap1     | YCplac33, GFP- <i>RAP1</i> , <i>URA3</i>                   | Hiraga et al., 2006          |

Belgareh, N., and V. Doye. 1997. Dynamics of nuclear pore distribution in nucleoporin mutant yeast cells. *J. Cell. Biol.* 136:747–759.

Bystricky, K., P. Heun, L. Gehlen, J. Langowski, and S.M. Gasser. 2004. Long-range compaction and flexibility of interphase chromatin in budding yeast analyzed by high-resolution imaging techniques. *Proc. Natl. Acad. Sci. USA.* 101:16495–16500.

Goldstein, A.L., and J.H. McCusker. 1999. Three new dominant drug resistance cassettes for gene disruption in *Saccharomyces cerevisiae*. *Yeast.* 15:1541–1553.

Hiraga, S., E.D. Robertson, and A.D. Donaldson. 2006. The Ctf18 RFC-like complex positions yeast telomeres but does not specify their replication time. *EMBO J.* 25:1505–1514.

Masumoto, H., D. Hawke, R. Kobayashi, and A. Verreault. 2005. A role for cell-cycle-regulated histone H3 lysine 56 acetylation in the DNA damage response. *Nature.* 436:294–298.

Straight, A.F., A.S. Belmont, C.C. Robinett, and A.W. Murray. 1996. GFP tagging of budding yeast chromosomes reveals that protein-protein interactions can mediate sister chromatid cohesion. *Curr. Biol.* 6:1599–1608.
